# Supplementary material for: DeepSurvNet: deep survival convolutional network for brain cancer survival rate classification based on histopathological images
Source: Med Biol Eng Comput. 2020 Mar 2;58(5):1031–45. doi: 10.1007/s11517-020-02147-3 (PMC7188709; doi:10.1007/s11517-020-02147-3)
Supplement: Supplementary file 1 — TCGA patient ID, brain tumour type and survival. (XLSX 25 kb) [file 11517_2020_2147_MOESM1_ESM.xlsx]

## Sheet: TCGA dataset description
Primary Diagnosis	Patient ID	Age (Year)	Dead_Time (Month)
Astrocytoma, anaplastic	TCGA-E1-A7YI	33.5041	3.64932
Astrocytoma, anaplastic	TCGA-DU-8158	57.8877	5.09589
Astrocytoma, anaplastic	TCGA-HT-A5RC	70.6082	5.32603
Astrocytoma, anaplastic	TCGA-S9-A6UA	66.4164	5.85205
Astrocytoma, anaplastic	TCGA-CS-5397	54.4274	6.37808
Astrocytoma, anaplastic	TCGA-DU-7012	74.0795	6.54247
Astrocytoma, anaplastic	TCGA-DU-6402	52.6219	7.03562
Astrocytoma, anaplastic	TCGA-CS-4941	67.337	7.69315
Astrocytoma, anaplastic	TCGA-VM-A8CD	58.0822	7.89041
Astrocytoma, anaplastic	TCGA-S9-A7IS	33.9781	7.92329
Astrocytoma, anaplastic	TCGA-DU-7292	69.2219	7.95616
Astrocytoma, anaplastic	TCGA-DU-7013	59.7918	8.84384
Astrocytoma, anaplastic	TCGA-DU-7290	45.663	10.3562
Astrocytoma, anaplastic	TCGA-S9-A7R2	69.6411	10.389
Astrocytoma, anaplastic	TCGA-DU-7006	60.2466	11.474
Astrocytoma, anaplastic	TCGA-E1-A7YK	52.7014	12.4274
Astrocytoma, anaplastic	TCGA-HW-A5KK	64.3397	12.7562
Astrocytoma, anaplastic	TCGA-E1-A7YD	57.589	14.3014
Astrocytoma, anaplastic	TCGA-DU-7010	58.0795	14.9918
Astrocytoma, anaplastic	TCGA-E1-A7YL	46.526	16.1753
Astrocytoma, anaplastic	TCGA-DH-A7UT	30.1753	17.4575
Astrocytoma, anaplastic	TCGA-DU-7298	38.9178	18.937
Astrocytoma, anaplastic	TCGA-E1-A7YJ	55.2877	19.463
Astrocytoma, anaplastic	TCGA-DU-6405	51.1945	19.8904
Astrocytoma, anaplastic	TCGA-E1-A7YM	63.7342	21.3041
Astrocytoma, anaplastic	TCGA-E1-A7YN	63.5068	23.9014
Astrocytoma, anaplastic	TCGA-S9-A6U0	46.274	24.3945
Astrocytoma, anaplastic	TCGA-TM-A84B	40.9123	24.9205
Astrocytoma, anaplastic	TCGA-FG-5963	23.4822	25.4795
Astrocytoma, anaplastic	TCGA-CS-6188	48.5726	26.7616
Astrocytoma, anaplastic	TCGA-S9-A7IX	57.7945	26.926
Astrocytoma, anaplastic	TCGA-E1-A7YE	32.7973	29.1288
Astrocytoma, anaplastic	TCGA-S9-A7R8	44.589	31.5945
Astrocytoma, anaplastic	TCGA-DU-A5TY	46.4247	33.9616
Astrocytoma, anaplastic	TCGA-CS-4943	37.1644	36.3616
Astrocytoma, anaplastic	TCGA-CS-6290	31.9616	37.3808
Astrocytoma, anaplastic	TCGA-DU-A7TI	32.6192	38.8932
Astrocytoma, anaplastic	TCGA-HW-8319	34.4027	39.7479
Astrocytoma, anaplastic	TCGA-CS-4942	44.6493	43.8904
Astrocytoma, anaplastic	TCGA-DU-7299	33.6055	44.0219
Astrocytoma, anaplastic	TCGA-DB-5277	34.863	50.8603
Astrocytoma, anaplastic	TCGA-TM-A7C3	43.8932	54.7726
Astrocytoma, anaplastic	TCGA-S9-A6TS	48.9233	62.1699
Astrocytoma, anaplastic	TCGA-E1-A7YH	47.8493	93.2055
Astrocytoma, NOS	TCGA-HT-7607	61.8767	3.15616
Astrocytoma, NOS	TCGA-QH-A6CX	66.4438	12.2301
Astrocytoma, NOS	TCGA-TM-A84C	32.463	16.1753
Astrocytoma, NOS	TCGA-E1-A7Z6	41.0548	32.3507
Astrocytoma, NOS	TCGA-DU-7007	33.5479	62.9589
Astrocytoma, NOS	TCGA-E1-A7Z3	31.0411	73.4795
Astrocytoma, NOS	TCGA-S9-A6U8	24.7781	98.2356
Astrocytoma, NOS	TCGA-E1-A7Z4	35.2027	145.052
Glioblastoma	TCGA-12-0657	69.6247	0.0986301
Glioblastoma	TCGA-19-2624	51.7562	0.164384
Glioblastoma	TCGA-41-4097	63.3068	0.19726
Glioblastoma	TCGA-06-0201	51.0932	0.394521
Glioblastoma	TCGA-06-0213	55.1616	0.526027
Glioblastoma	TCGA-02-0439	70.2027	0.657534
Glioblastoma	TCGA-19-0962	77.7589	0.657534
Glioblastoma	TCGA-08-0392	60.4274	0.723288
Glioblastoma	TCGA-06-0219	67.0904	0.723288
Glioblastoma	TCGA-41-2571	89.3479	0.854795
Glioblastoma	TCGA-06-0750	43.8849	0.920548
Glioblastoma	TCGA-14-1455	61.8137	0.920548
Glioblastoma	TCGA-14-1794	59.2548	0.986301
Glioblastoma	TCGA-41-3392	88.6329	0.986301
Glioblastoma	TCGA-19-2621	83.3671	1.08493
Glioblastoma	TCGA-14-1396	78.7753	1.11781
Glioblastoma	TCGA-14-1453	69.3068	1.15068
Glioblastoma	TCGA-08-0352	79.7425	1.28219
Glioblastoma	TCGA-14-0813	78.3068	1.34795
Glioblastoma	TCGA-06-6391	44.4	1.47945
Glioblastoma	TCGA-28-1755	52.7753	1.54521
Glioblastoma	TCGA-81-5910	64.5671	1.61096
Glioblastoma	TCGA-08-0345	71.1233	1.74247
Glioblastoma	TCGA-19-5955	83.6986	1.77534
Glioblastoma	TCGA-14-1795	66.7808	1.9726
Glioblastoma	TCGA-14-0867	67.9863	2.03836
Glioblastoma	TCGA-06-0649	73.4137	2.10411
Glioblastoma	TCGA-14-0787	69.3863	2.23562
Glioblastoma	TCGA-06-0145	53.8658	2.33425
Glioblastoma	TCGA-08-0385	71.874	2.69589
Glioblastoma	TCGA-06-0747	53.8548	2.69589
Glioblastoma	TCGA-06-0749	50.8795	2.69589
Glioblastoma	TCGA-06-5418	75.5726	2.72877
Glioblastoma	TCGA-02-0033	54.9863	2.8274
Glioblastoma	TCGA-27-2526	79.389	2.86027
Glioblastoma	TCGA-06-0157	63.3644	3.18904
Glioblastoma	TCGA-06-0174	54.3123	3.22192
Glioblastoma	TCGA-02-0048	80.2712	3.22192
Glioblastoma	TCGA-19-1789	69.2658	3.25479
Glioblastoma	TCGA-06-0169	68.8411	3.28767
Glioblastoma	TCGA-08-0359	59.5836	3.3863
Glioblastoma	TCGA-02-0099	46.7945	3.48493
Glioblastoma	TCGA-06-5410	72.3151	3.55068
Glioblastoma	TCGA-02-0037	74.1452	3.61644
Glioblastoma	TCGA-12-0692	75.3945	3.64932
Glioblastoma	TCGA-19-1392	72.8575	3.64932
Glioblastoma	TCGA-19-1788	39.1808	3.68219
Glioblastoma	TCGA-06-5856	58.1699	3.74795
Glioblastoma	TCGA-14-1401	54.5781	3.74795
Glioblastoma	TCGA-19-A6J4	68.6521	3.97808
Glioblastoma	TCGA-12-1098	75.9616	3.97808
Glioblastoma	TCGA-06-0127	67.1288	3.97808
Glioblastoma	TCGA-02-0281	78.6192	3.97808
Glioblastoma	TCGA-06-1087	75.7753	4.04384
Glioblastoma	TCGA-19-2625	76.5205	4.07671
Glioblastoma	TCGA-12-1099	68.5863	4.14247
Glioblastoma	TCGA-08-0246	57.463	4.17534
Glioblastoma	TCGA-08-0510	75.8219	4.27397
Glioblastoma	TCGA-02-0333	77.9425	4.3726
Glioblastoma	TCGA-08-0373	69.2438	4.40548
Glioblastoma	TCGA-41-3393	81.9288	4.43836
Glioblastoma	TCGA-06-0173	72.737	4.47123
Glioblastoma	TCGA-06-5412	78.8	4.53699
Glioblastoma	TCGA-19-1389	51.1205	4.63562
Glioblastoma	TCGA-19-5953	58.0932	4.73425
Glioblastoma	TCGA-02-0003	50.2493	4.73425
Glioblastoma	TCGA-08-0521	17.4712	4.8
Glioblastoma	TCGA-19-2620	70.3151	4.86575
Glioblastoma	TCGA-19-1790	56.5096	5.06301
Glioblastoma	TCGA-27-1830	57.8932	5.06301
Glioblastoma	TCGA-06-6388	64.4356	5.2274
Glioblastoma	TCGA-14-0817	69.6575	5.39178
Glioblastoma	TCGA-06-6390	58.4329	5.39178
Glioblastoma	TCGA-02-0071	53.2192	5.49041
Glioblastoma	TCGA-06-0197	66.0137	5.55616
Glioblastoma	TCGA-06-0646	61.0219	5.75342
Glioblastoma	TCGA-06-0645	56.0247	5.75342
Glioblastoma	TCGA-12-1089	64.1616	5.81918
Glioblastoma	TCGA-06-0156	57.3479	5.85205
Glioblastoma	TCGA-06-0166	51.7863	5.85205
Glioblastoma	TCGA-14-1827	51.5836	5.88493
Glioblastoma	TCGA-OX-A56R	68.9808	5.91781
Glioblastoma	TCGA-06-0122	84.8438	6.14795
Glioblastoma	TCGA-14-0783	36.0521	6.2137
Glioblastoma	TCGA-RR-A6KA	72.8274	6.27945
Glioblastoma	TCGA-02-0054	44.4493	6.54247
Glioblastoma	TCGA-19-5947	47.1726	6.6411
Glioblastoma	TCGA-14-1458	54.5178	6.67397
Glioblastoma	TCGA-12-1602	58.8822	6.7726
Glioblastoma	TCGA-06-1086	42.863	6.83836
Glioblastoma	TCGA-06-0126	86.6493	6.93699
Glioblastoma	TCGA-19-2631	74.5205	7.00274
Glioblastoma	TCGA-14-1452	60.5644	7.10137
Glioblastoma	TCGA-08-0524	17.7096	7.26575
Glioblastoma	TCGA-02-0326	82.6301	7.33151
Glioblastoma	TCGA-06-0210	72.8767	7.39726
Glioblastoma	TCGA-06-0195	63.3753	7.39726
Glioblastoma	TCGA-08-0531	64.3342	7.56164
Glioblastoma	TCGA-12-1090	58.5671	7.59452
Glioblastoma	TCGA-12-0654	48.2877	7.59452
Glioblastoma	TCGA-27-2524	56.3151	7.59452
Glioblastoma	TCGA-06-0209	76.3753	7.6274
Glioblastoma	TCGA-12-0775	75.5205	7.6274
Glioblastoma	TCGA-14-1825	70.3671	7.6274
Glioblastoma	TCGA-06-0206	40.9233	7.66027
Glioblastoma	TCGA-08-0511	69.3151	7.72603
Glioblastoma	TCGA-06-0745	59.9562	7.85753
Glioblastoma	TCGA-19-5951	76.6986	8.02192
Glioblastoma	TCGA-02-0058	28.8137	8.35068
Glioblastoma	TCGA-06-5411	51.5945	8.35068
Glioblastoma	TCGA-08-0353	58.4438	8.41644
Glioblastoma	TCGA-08-0346	69.6137	8.41644
Glioblastoma	TCGA-06-0208	52.3507	8.41644
Glioblastoma	TCGA-02-0086	45.926	8.81096
Glioblastoma	TCGA-26-5135	72.5753	8.87671
Glioblastoma	TCGA-12-0828	57.2849	8.94247
Glioblastoma	TCGA-19-1386	51.1726	9.07397
Glioblastoma	TCGA-12-1096	55.674	9.10685
Glioblastoma	TCGA-02-0446	61.7562	9.27123
Glioblastoma	TCGA-26-1799	68.9616	9.36986
Glioblastoma	TCGA-41-2575	75.5808	9.53425
Glioblastoma	TCGA-12-0776	52.6795	9.73151
Glioblastoma	TCGA-08-0349	46.4767	9.79726
Glioblastoma	TCGA-06-0648	78.0192	9.79726
Glioblastoma	TCGA-27-1832	59.3918	9.86301
Glioblastoma	TCGA-02-0321	74.3151	9.89589
Glioblastoma	TCGA-06-0148	76.2795	10.0932
Glioblastoma	TCGA-02-0074	68.2356	10.1918
Glioblastoma	TCGA-06-0141	62.811	10.2904
Glioblastoma	TCGA-06-0190	62.5616	10.4219
Glioblastoma	TCGA-12-0620	57.7233	10.4548
Glioblastoma	TCGA-02-0430	67.5096	10.5534
Glioblastoma	TCGA-02-0338	41.7288	10.5863
Glioblastoma	TCGA-02-0009	61.526	10.5863
Glioblastoma	TCGA-12-0821	62.874	10.6192
Glioblastoma	TCGA-02-0325	61.9123	10.6192
Glioblastoma	TCGA-02-0038	48.6274	10.7178
Glioblastoma	TCGA-02-0269	69.0247	10.7507
Glioblastoma	TCGA-19-1385	69.7507	10.7507
Glioblastoma	TCGA-08-0520	70.5918	10.7507
Glioblastoma	TCGA-06-0158	73.5781	10.8164
Glioblastoma	TCGA-12-3650	46.9534	10.9479
Glioblastoma	TCGA-08-0514	69.7452	11.0795
Glioblastoma	TCGA-14-0789	54.9315	11.2438
Glioblastoma	TCGA-02-0440	62.8904	11.3425
Glioblastoma	TCGA-02-0004	59.2247	11.3425
Glioblastoma	TCGA-27-1838	59.4685	11.5068
Glioblastoma	TCGA-06-5408	54.9671	11.737
Glioblastoma	TCGA-06-0143	58.5918	11.737
Glioblastoma	TCGA-02-0001	44.326	11.7699
Glioblastoma	TCGA-06-1801	56.2685	11.8356
Glioblastoma	TCGA-06-0211	47.9863	11.8356
Glioblastoma	TCGA-41-3915	48.9863	11.8356
Glioblastoma	TCGA-06-0139	40.3534	11.9014
Glioblastoma	TCGA-19-5954	72.2055	12.0986
Glioblastoma	TCGA-12-0691	63.0658	12.1315
Glioblastoma	TCGA-08-0348	64.0356	12.1644
Glioblastoma	TCGA-02-0027	33.8877	12.1644
Glioblastoma	TCGA-12-1094	56.4	12.2301
Glioblastoma	TCGA-08-0375	51.8932	12.2301
Glioblastoma	TCGA-02-0317	40.0986	12.2301
Glioblastoma	TCGA-06-0152	68.0658	12.3288
Glioblastoma	TCGA-02-0339	67.189	12.3945
Glioblastoma	TCGA-14-1459	63.6466	12.4274
Glioblastoma	TCGA-08-0509	63.7616	12.5589
Glioblastoma	TCGA-02-0052	49.4822	12.5918
Glioblastoma	TCGA-06-0644	71.9096	12.6247
Glioblastoma	TCGA-19-1787	49.0247	12.6575
Glioblastoma	TCGA-12-3651	77.4712	12.6904
Glioblastoma	TCGA-19-1388	58.5425	12.9534
Glioblastoma	TCGA-06-0130	54.2795	12.9534
Glioblastoma	TCGA-12-0618	49.5096	12.9863
Glioblastoma	TCGA-06-0171	65.9863	13.1178
Glioblastoma	TCGA-15-1449	65.2822	13.2822
Glioblastoma	TCGA-06-0238	46.6767	13.3151
Glioblastoma	TCGA-41-2572	67.137	13.3479
Glioblastoma	TCGA-06-0237	75.9863	13.6438
Glioblastoma	TCGA-15-0742	65.8904	13.7753
Glioblastoma	TCGA-26-1439	63.8411	13.874
Glioblastoma	TCGA-02-0285	50.2822	13.874
Glioblastoma	TCGA-06-0154	54.8438	13.9397
Glioblastoma	TCGA-08-0390	69.326	13.9726
Glioblastoma	TCGA-27-1837	36.6247	14.0384
Glioblastoma	TCGA-19-5958	56.0712	14.0712
Glioblastoma	TCGA-02-0034	60.7288	14.137
Glioblastoma	TCGA-06-0686	53.4329	14.2027
Glioblastoma	TCGA-02-0289	57.6192	14.2027
Glioblastoma	TCGA-19-0963	61.1671	14.2685
Glioblastoma	TCGA-06-0133	64.1151	14.3014
Glioblastoma	TCGA-27-2527	81.1479	14.4
Glioblastoma	TCGA-02-0422	50.3233	14.4986
Glioblastoma	TCGA-12-1097	61.7151	14.5315
Glioblastoma	TCGA-12-3653	34.326	14.5315
Glioblastoma	TCGA-12-1600	86.0795	14.7288
Glioblastoma	TCGA-02-0047	78.7918	14.7288
Glioblastoma	TCGA-12-0616	36.8521	14.7288
Glioblastoma	TCGA-12-0780	51.0849	14.8603
Glioblastoma	TCGA-12-0778	53.3151	14.926
Glioblastoma	TCGA-08-0380	74.7315	14.926
Glioblastoma	TCGA-19-5960	56.5507	14.9589
Glioblastoma	TCGA-06-0214	66.2658	15.0247
Glioblastoma	TCGA-12-0769	52.5233	15.0575
Glioblastoma	TCGA-41-5651	59.4466	15.1233
Glioblastoma	TCGA-12-3649	76.2904	15.2219
Glioblastoma	TCGA-06-1802	61.7452	15.3205
Glioblastoma	TCGA-08-0389	59.2822	15.3534
Glioblastoma	TCGA-12-0615	78.3096	15.3534
Glioblastoma	TCGA-08-0360	76.4247	15.3863
Glioblastoma	TCGA-06-0189	55.6082	15.4192
Glioblastoma	TCGA-02-0115	52.7589	15.6493
Glioblastoma	TCGA-12-1598	75.9726	15.6493
Glioblastoma	TCGA-27-2528	62.6493	15.7808
Glioblastoma	TCGA-12-1095	65.137	15.8466
Glioblastoma	TCGA-02-0330	51.1068	15.9123
Glioblastoma	TCGA-14-1034	60.3534	15.9452
Glioblastoma	TCGA-08-0525	52.0904	15.9781
Glioblastoma	TCGA-12-1093	66.5671	15.9781
Glioblastoma	TCGA-27-2523	63.1068	16.0767
Glioblastoma	TCGA-02-0451	62.0877	16.2082
Glioblastoma	TCGA-02-0258	36.3534	16.537
Glioblastoma	TCGA-06-0881	50.0767	16.5699
Glioblastoma	TCGA-27-1831	66.9781	16.6027
Glioblastoma	TCGA-27-2521	34.7534	16.7671
Glioblastoma	TCGA-19-5959	77.9425	16.8
Glioblastoma	TCGA-19-5950	52.7233	17.1945
Glioblastoma	TCGA-02-0266	14.5288	17.7205
Glioblastoma	TCGA-06-0147	51.3507	17.7863
Glioblastoma	TCGA-14-1821	31.0384	17.7863
Glioblastoma	TCGA-14-1823	58.5863	17.8521
Glioblastoma	TCGA-08-0354	52.6	17.9507
Glioblastoma	TCGA-08-0386	74.1178	18.0164
Glioblastoma	TCGA-27-2519	48.5342	18.0822
Glioblastoma	TCGA-02-0006	56.2082	18.3452
Glioblastoma	TCGA-08-0529	56.3178	18.411
Glioblastoma	TCGA-12-0820	40.7616	18.4767
Glioblastoma	TCGA-19-5952	62.5781	18.9041
Glioblastoma	TCGA-26-5136	78.0712	18.9699
Glioblastoma	TCGA-14-1037	66.9205	19.2986
Glioblastoma	TCGA-08-0518	60.2603	19.3315
Glioblastoma	TCGA-08-0516	14.5452	19.5945
Glioblastoma	TCGA-06-0168	59.6603	19.6603
Glioblastoma	TCGA-06-0221	31.0493	19.8247
Glioblastoma	TCGA-02-0023	38.3644	20.1205
Glioblastoma	TCGA-06-0124	67.3726	20.3836
Glioblastoma	TCGA-12-0703	46.9178	20.3836
Glioblastoma	TCGA-RR-A6KC	55.6219	20.5479
Glioblastoma	TCGA-12-0829	75.263	20.5808
Glioblastoma	TCGA-02-0015	50.4219	20.6137
Glioblastoma	TCGA-02-0011	18.9753	20.7123
Glioblastoma	TCGA-06-0882	30.4438	20.7781
Glioblastoma	TCGA-02-0075	63.5753	20.8438
Glioblastoma	TCGA-08-0522	61.4082	20.8767
Glioblastoma	TCGA-27-1835	53.2712	21.3041
Glioblastoma	TCGA-12-1092	58.6603	21.7315
Glioblastoma	TCGA-19-0957	48.5315	21.8959
Glioblastoma	TCGA-08-0358	50.3644	22.2904
Glioblastoma	TCGA-19-5956	53.674	22.4877
Glioblastoma	TCGA-08-0244	62.1479	22.6849
Glioblastoma	TCGA-06-0128	66.3479	22.7178
Glioblastoma	TCGA-14-0786	50.937	23.0466
Glioblastoma	TCGA-14-1451	39.4548	23.1123
Glioblastoma	TCGA-02-0007	40.5644	23.1781
Glioblastoma	TCGA-12-0822	46.0356	23.5068
Glioblastoma	TCGA-06-1084	54.5178	23.9342
Glioblastoma	TCGA-06-0216	61.7096	24.1644
Glioblastoma	TCGA-19-2629	60.9781	24.2301
Glioblastoma	TCGA-27-1833	67.3753	24.2301
Glioblastoma	TCGA-06-0138	43.1123	24.2301
Glioblastoma	TCGA-08-0355	30.4082	24.5589
Glioblastoma	TCGA-02-0026	27.4575	24.5918
Glioblastoma	TCGA-27-2518	52.411	24.7562
Glioblastoma	TCGA-12-0819	49.7534	24.789
Glioblastoma	TCGA-02-0337	48.337	25.1178
Glioblastoma	TCGA-19-1390	63.1863	25.3808
Glioblastoma	TCGA-12-1599	47.7589	25.6767
Glioblastoma	TCGA-02-0332	46.6329	25.7096
Glioblastoma	TCGA-08-0347	50.3671	25.7096
Glioblastoma	TCGA-12-0670	60.7918	25.9726
Glioblastoma	TCGA-06-0743	69.6822	26.4
Glioblastoma	TCGA-02-0068	57.9726	26.4329
Glioblastoma	TCGA-12-0688	74.2055	26.663
Glioblastoma	TCGA-06-0137	63.7616	26.6959
Glioblastoma	TCGA-06-1800	61.1836	26.7945
Glioblastoma	TCGA-12-3648	61.5425	26.926
Glioblastoma	TCGA-06-0187	69.3644	27.2219
Glioblastoma	TCGA-02-0079	58.0082	27.2548
Glioblastoma	TCGA-12-0826	38.0466	27.7808
Glioblastoma	TCGA-12-0707	55.1671	28.4055
Glioblastoma	TCGA-14-0871	75.0329	28.9315
Glioblastoma	TCGA-08-0350	32.6164	29.2274
Glioblastoma	TCGA-27-1836	33.0411	30.0493
Glioblastoma	TCGA-14-1454	54.4849	30.1808
Glioblastoma	TCGA-08-0356	60	31.1014
Glioblastoma	TCGA-14-1402	58.6877	32.0548
Glioblastoma	TCGA-12-1091	10.9096	33.2055
Glioblastoma	TCGA-06-0129	30.9151	33.6658
Glioblastoma	TCGA-12-0619	60.0548	34.9151
Glioblastoma	TCGA-12-3652	60.0548	34.9151
Glioblastoma	TCGA-02-0010	20.4164	35.4082
Glioblastoma	TCGA-08-0357	49.7096	37.5781
Glioblastoma	TCGA-08-0245	31.8164	37.8411
Glioblastoma	TCGA-12-0662	51.2795	38.1699
Glioblastoma	TCGA-12-0827	38.611	38.7616
Glioblastoma	TCGA-06-0192	58.2	38.9589
Glioblastoma	TCGA-06-0879	52.4767	40.4055
Glioblastoma	TCGA-27-1834	56.3507	40.537
Glioblastoma	TCGA-08-0512	48.8247	42.1479
Glioblastoma	TCGA-02-0025	47.6767	42.7397
Glioblastoma	TCGA-12-0773	24.2438	43.2329
Glioblastoma	TCGA-12-3646	59.8767	44.0219
Glioblastoma	TCGA-06-0188	71.4521	44.5808
Glioblastoma	TCGA-06-0744	67.0438	46.8822
Glioblastoma	TCGA-02-0432	36.3288	47.1123
Glioblastoma	TCGA-06-0125	63.9534	47.6055
Glioblastoma	TCGA-06-0241	66.0301	48.6904
Glioblastoma	TCGA-15-1444	21.4438	50.5315
Glioblastoma	TCGA-02-0085	63.8055	51.3205
Glioblastoma	TCGA-02-0024	35.9342	53.0959
Glioblastoma	TCGA-12-0772	46.6274	53.8521
Glioblastoma	TCGA-08-0517	34.989	58.6849
Glioblastoma	TCGA-12-3644	47.8575	59.7699
Glioblastoma	TCGA-08-0351	40.6521	65.326
Glioblastoma	TCGA-06-0184	63.8822	69.8959
Glioblastoma	TCGA-02-0021	43.9315	77.6548
Glioblastoma	TCGA-02-0014	25.6685	82.5863
Glioblastoma	TCGA-02-0016	50.0575	87.0575
Glioblastoma	TCGA-06-0178	39	88.1425
Glioblastoma	TCGA-12-0818	45.6603	91.7589
Glioblastoma	TCGA-12-0656	48.9452	94.7836
Glioblastoma	TCGA-08-0344	66.4466	115.858
Glioblastoma	TCGA-12-1088	53.8822	127.595
Mixed glioma	TCGA-E1-A7YU	42.0411	0.756164
Mixed glioma	TCGA-DU-5852	61.2274	6.73973
Mixed glioma	TCGA-DU-A7TD	52.1233	7.49589
Mixed glioma	TCGA-DU-6403	60.3589	11.6384
Mixed glioma	TCGA-DB-A64W	65.5781	14.4
Mixed glioma	TCGA-DU-8162	61.9068	14.5973
Mixed glioma	TCGA-DU-6406	59.2712	16.8329
Mixed glioma	TCGA-CS-6186	58.4137	17.6877
Mixed glioma	TCGA-FG-A4MW	63.2247	18.3781
Mixed glioma	TCGA-DH-5140	38.2	19.9562
Mixed glioma	TCGA-CS-5395	43.4192	21.0082
Mixed glioma	TCGA-DU-7304	43.6466	23.3096
Mixed glioma	TCGA-DU-8161	63.189	23.737
Mixed glioma	TCGA-DB-A64O	59.7562	25.4795
Mixed glioma	TCGA-TQ-A7RW	32.3397	26.9918
Mixed glioma	TCGA-E1-A7YV	26.1534	32.4493
Mixed glioma	TCGA-E1-A7YW	28.9616	36.8219
Mixed glioma	TCGA-FG-5965	39.0384	36.8219
Mixed glioma	TCGA-HT-8018	40.8493	37.874
Mixed glioma	TCGA-TM-A84L	31.5014	40.8329
Mixed glioma	TCGA-HW-7489	38.9068	41.4904
Mixed glioma	TCGA-DU-6395	31.737	49.0192
Mixed glioma	TCGA-HT-8013	37.6795	63.5507
Mixed glioma	TCGA-DU-6396	31.3068	75.1562
Mixed glioma	TCGA-DU-7011	25.5397	105.205
Mixed glioma	TCGA-DU-A7T8	35.9123	139.036
Oligodendroglioma, anaplastic	TCGA-HT-7616	75.8493	0.230137
Oligodendroglioma, anaplastic	TCGA-HT-7882	66.9863	3.71507
Oligodendroglioma, anaplastic	TCGA-HT-7469	30.4027	11.5397
Oligodendroglioma, anaplastic	TCGA-E1-A7YS	71.6685	15.3205
Oligodendroglioma, anaplastic	TCGA-HT-A61C	66.5096	17.6548
Oligodendroglioma, anaplastic	TCGA-DU-A7T6	73.3315	17.9836
Oligodendroglioma, anaplastic	TCGA-FG-6692	64.0384	18.4438
Oligodendroglioma, anaplastic	TCGA-DU-A76R	51.8877	21.3041
Oligodendroglioma, anaplastic	TCGA-DU-6394	53.537	22.4219
Oligodendroglioma, anaplastic	TCGA-DU-A76L	54.3096	26.7616
Oligodendroglioma, anaplastic	TCGA-DH-A669	70.7096	30.2137
Oligodendroglioma, anaplastic	TCGA-DU-7018	57.5863	30.674
Oligodendroglioma, anaplastic	TCGA-HW-A5KJ	68.4	31.6274
Oligodendroglioma, anaplastic	TCGA-TM-A84O	61.1699	33.2384
Oligodendroglioma, anaplastic	TCGA-HT-7470	37.2904	40.1096
Oligodendroglioma, anaplastic	TCGA-DU-6397	45.7397	46.0603
Oligodendroglioma, anaplastic	TCGA-DU-6393	66.526	52.1096
Oligodendroglioma, anaplastic	TCGA-DU-7300	53.726	62.0055
Oligodendroglioma, anaplastic	TCGA-E1-A7YO	45.9452	75.0247
Oligodendroglioma, anaplastic	TCGA-DU-6408	23.9781	114.082
Oligodendroglioma, anaplastic	TCGA-DU-6404	24.7151	133.742
Oligodendroglioma, NOS	TCGA-DU-6400	66.0877	1.21644
Oligodendroglioma, NOS	TCGA-DU-A76K	87.0575	11.4082
Oligodendroglioma, NOS	TCGA-E1-A7Z2	58.4685	13.0849
Oligodendroglioma, NOS	TCGA-IK-7675	43.5616	19.0027
Oligodendroglioma, NOS	TCGA-DU-7301	53.8192	25.9068
Oligodendroglioma, NOS	TCGA-TQ-A8XE	42.8192	31.3644
Oligodendroglioma, NOS	TCGA-DU-A7TG	40.1945	44.4164
Oligodendroglioma, NOS	TCGA-FG-A711	33.5562	48.6904
Oligodendroglioma, NOS	TCGA-DU-6399	54.537	65.7534
Oligodendroglioma, NOS	TCGA-DU-6401	31.7671	87.4521
Oligodendroglioma, NOS	TCGA-DU-6407	35.674	94.5205
Oligodendroglioma, NOS	TCGA-DU-7014	59.9041	117.403
Oligodendroglioma, NOS	TCGA-E1-A7YY	27.0329	146.137
Oligodendroglioma, NOS	TCGA-DU-7009	32.4767	154.356
Oligodendroglioma, NOS	TCGA-S9-A7R1	35.1452	169.841
